# Supplementary material for: Economic Costs of Providing District- and Regional-Level Surgeries in Tanzania
Source: PubMed Central journal article supplement (PMC9808166; doi:10.34172/ijhpm.2021.09), 2021-02-23
Supplement: ijhpm-11-1120-s001.pdf [file ijhpm-11-1120-s001.pdf]

## Supplementary file 1

**Table S1.** Assumptions and Allocation Factors for Step-Down of Overhead Costs for Mt Meru RH

| Department                               | Allocation factors in base analysis | Assumptions/Special considerations                        | Allocation factors in secondary analysis |
|------------------------------------------|-------------------------------------|-----------------------------------------------------------|------------------------------------------|
| General Administration                   | <i>Cost of personnel</i>            |                                                           | <i>Staff number</i>                      |
| Medical Stores                           | <i>Volume of supplies</i>           |                                                           | <i>Volume of supplies</i>                |
| Medical Engineering                      | <i>Cost of the equipment</i>        | <i>Only clinical departments were considered</i>          | <i>Cost of the equipment</i>             |
| General Transport                        | <i>Personnel cost</i>               |                                                           | <i>Number of Inpatient</i>               |
| Kitchen                                  | <i>Number of inpatients</i>         |                                                           | <i>Number of inpatients</i>              |
| Laundry Services                         | <i>Number of nurses &amp; MA's</i>  |                                                           | <i>Costs of buildings</i>                |
| Environmentals + security                | <i>Cost of the buildings</i>        |                                                           | <i>Personnel Cost</i>                    |
| Housing + Mortuary                       | <i>Cost of personnel</i>            | <i>Only clinical departments were considered</i>          | <i>Number of nurses/MA</i>               |
| Medical Records Services (including ICT) | <i>Cost of personnel</i>            |                                                           | <i>Cost of personnel</i>                 |
| Pharmacy                                 | <i>Number of nurses &amp; MA's</i>  | <i>Radiology and laboratory departments were excluded</i> | <i>Number of nurses &amp; MA's</i>       |
| Utilities                                | <i>Cost of the buildings</i>        |                                                           | <i>Cost of the buildings</i>             |

**Table S2.** Assumptions and Allocation Factors for Step-Down of Overhead Costs for Meru DH

| Department                            | Allocation factors in base analysis | Assumptions/Special considerations                  | Allocation factors in secondary analysis |
|---------------------------------------|-------------------------------------|-----------------------------------------------------|------------------------------------------|
| General Administration                | <i>Cost of personnel</i>            |                                                     | <i>Staff number</i>                      |
| Medical Stores                        | <i>Volume of supplies</i>           |                                                     | <i>Volume of supplies</i>                |
| Registry (Staff records) and M&E Unit | <i>Number of staff members</i>      |                                                     | <i>Cost of the equipment</i>             |
| General Transport/DIVO                | <i>Personnel cost</i>               |                                                     | <i>Number of Inpatient</i>               |
| Kitchen + Housing                     | <i>Number of staff members</i>      | <i>Kitchen here serves staff and not patients</i>   | <i>Number of inpatients</i>              |
| Laundry Services                      | <i>Number of nurses &amp; MA's</i>  | <i>Number of nurses correlate with patient load</i> | <i>Costs of buildings</i>                |

|                           |                                    |                                                                       |                                    |
|---------------------------|------------------------------------|-----------------------------------------------------------------------|------------------------------------|
| Social Welfare Department | <i>Number of nurses &amp; MA's</i> |                                                                       | <i>Personnel Cost</i>              |
| BIMA Records              | <i>Number of nurses &amp; MA's</i> |                                                                       | <i>Number of nurses/MA</i>         |
| Medical Records Services  | <i>Number of nurses &amp; MA's</i> |                                                                       | <i>Cost of personnel</i>           |
| Dispensary/Pharmacy       | <i>Number of nurses &amp; MA's</i> | <i>Physiology, radiology and laboratory departments were excluded</i> | <i>Number of nurses &amp; MA's</i> |
| Utilities                 | <i>Cost of the buildings</i>       |                                                                       | <i>Cost of the buildings</i>       |

**Table S3.** Assumptions and Allocation Factors for Step-Down of Overhead Costs for Oltrumet DH

| <b>Department</b>        | <b>Allocation factors in base analysis</b> | <b>Assumptions/Special considerations</b>                          | <b>Allocation factors in secondary analysis</b> |
|--------------------------|--------------------------------------------|--------------------------------------------------------------------|-------------------------------------------------|
| General Administration   | <i>Cost of personnel</i>                   |                                                                    | <i>Number of Staff</i>                          |
| Accounts                 | <i>Cost of personnel</i>                   |                                                                    | <i>Number of Staff</i>                          |
| Staff Housing            | <i>Number of staff members</i>             |                                                                    | <i>Personnel cost</i>                           |
| General Transport        | <i>Personnel cost</i>                      |                                                                    | <i>Personnel cost</i>                           |
| Kitchen                  | <i>Number of staff members</i>             | <i>Kitchen here serves staff and not patients</i>                  | <i>Personnel cost</i>                           |
| Laundry Services         | <i>Number of nurses &amp; MA's</i>         |                                                                    | <i>Cost of buildings</i>                        |
| Security                 | <i>Cost (size) of buildings</i>            |                                                                    | <i>Cost (size) of buildings</i>                 |
| Mortuary                 | <i>Number of admissions</i>                |                                                                    | <i>Number of admissions</i>                     |
| Medical Records Services | <i>Number of nurses &amp; MA's</i>         |                                                                    | <i>Number of nurses &amp; MA's</i>              |
| Dispensary/Pharmacy      | <i>Number of nurses &amp; MA's</i>         | <i>Physiotherapy, radiology and laboratory depts were excluded</i> | <i>Number of nurses &amp; MA's</i>              |
| Utilities                | <i>Cost of the buildings</i>               |                                                                    | <i>Cost of the buildings</i>                    |

**Table S4.** Types of Major Surgeries Performed at the Hospitals and Their Volumes

| <b>Types of surgeries</b> | <b>Volumes (number of procedures performed in 12 months)</b> |         |             |
|---------------------------|--------------------------------------------------------------|---------|-------------|
|                           | Mt Meru RH                                                   | Meru DH | Oltrumet DH |
| Herniorrhaphy             | 163                                                          | 14      | 8           |

|                                   |              |            |            |
|-----------------------------------|--------------|------------|------------|
| CS                                | 2,374        | 767        | 367        |
| Myomectomy                        | 13           | 10         | 5          |
| Salpingectomy                     | 102          | 23         | -          |
| Appendectomy                      | 70           | 13         | -          |
| Laparotomy                        | 177          | -          | -          |
| Adenotonsillectomy                | 16           | -          | -          |
| Tonsillectomy                     | 21           | -          | -          |
| Adenectomy                        | 31           | -          | -          |
| Surgical debridement              | 100          | -          | -          |
| ORIF                              | 29           | -          | -          |
| Hysterectomy                      | 88           | -          | -          |
| Hydrocoelelectomy                 | -            | 5          | -          |
| Other major general surgeries     | 139          | 1          | 4          |
| Other major Obs/Gynae surgeries   | 31           | 9          | 6          |
| Other major orthopaedic surgeries | 77           | -          | -          |
| Other major ENT surgeries         | 26           | -          | -          |
| <b>Total</b>                      | <b>3,457</b> | <b>842</b> | <b>390</b> |

**Table S5.** Direct Costs of Overhead Departments at Mt Meru RH (in USD)

| COST CENTRES                  | Direct Costs |                 |                   |               | Total   |
|-------------------------------|--------------|-----------------|-------------------|---------------|---------|
|                               | Recurrent    |                 | Capital           |               |         |
|                               | Personnel    | Other recurrent | Medical equipment | Other capital |         |
| <b>General Administration</b> | 228,159      | 20,295          |                   | 4,385         | 259,839 |
| <b>Medical Stores</b>         | 9,501        | 33,874          |                   | 4,852         | 48,226  |
| <b>Medical Engineering</b>    | 3,694        | 42,340          |                   | 0             | 46,033  |

|                                          |            |            |           |            |             |
|------------------------------------------|------------|------------|-----------|------------|-------------|
| <b>General Transport</b>                 | 17,448     | 0          |           | 34,162     | 51,610      |
| <b>Kitchen</b>                           | 15,085     | 16,867     |           | 2,466      | 34,419      |
| <b>Laundry Services</b>                  | 19,784     | 3,111      |           | 188        | 23,084      |
| <b>Environmental Services + Security</b> | 18,786     | 0          |           | 158        | 18,945      |
| <b>Housing + Mortuary</b>                | 0          | 0          |           | 4,347      | 4,347       |
| <b>Medical Records Services</b>          | 57,996     | 11,756     |           | 2,272      | 72,024      |
| <b>Pharmacy</b>                          | 69,710     | 819        |           | 165,298    | 235,827     |
| <b>Utilities</b>                         | 0          | 119,603    |           | 0          | 119,603     |
| <b>Total</b>                             | 440,163    | 248,664    |           | 218,128    | 906,955     |
|                                          | <b>49%</b> | <b>28%</b> | <b>0%</b> | <b>23%</b> | <b>100%</b> |

**Table S6.** Direct Costs of Clinical Departments at Mt Meru RH (in USD)

| <b>COST CENTRES</b>                 | <b>Direct Costs</b> |                 |                   |               |         |
|-------------------------------------|---------------------|-----------------|-------------------|---------------|---------|
|                                     | Recurrent           |                 | Capital           |               | Total   |
|                                     | Personnel           | Other recurrent | Medical equipment | Other capital |         |
| <b>OPD/Casualty</b>                 | 215,197             | 230,684         |                   | 2,110         | 447,991 |
| <b>Laboratory</b>                   | 114,755             | 150,246         | 691               | 3,264         | 268,956 |
| <b>Radiology</b>                    | 62,566              | 11,793          | 6,047             | 1,596         | 82,002  |
| <b>Obs/Gynae Theatre</b>            | 115,070             | 39,062          | 332               | 1,160         | 155,625 |
| <b>Main Operating Theatre</b>       | 147,057             | 29,893          | 659               | 2,510         | 180,119 |
| <b>Paediatric Ward</b>              | 218,173             | 5,559           |                   | 11,514        | 235,245 |
| <b>Maternity Wards + Gynae OPD</b>  | 232,996             | 47,938          |                   | 16,235        | 297,169 |
| <b>SOPD</b>                         | 24,492              | 1,979           |                   | 548           | 27,019  |
| <b>Eye Department</b>               | 46,778              | 4,824           |                   | 1,286         | 52,888  |
| <b>Medical Ward + CTC + TB Unit</b> | 290,842             | 12,683          |                   | 17,564        | 321,089 |
| <b>Surgical Ward</b>                | 261,420             | 60,302          |                   | 10,776        | 332,498 |

|                                            |            |            |             |           |             |
|--------------------------------------------|------------|------------|-------------|-----------|-------------|
| <b>Dental Health</b>                       | 49,499     | 6,997      |             | 543       | 57,039      |
| <b>Physiotherapy + Mental Health + ICU</b> | 147,529    | 6,650      |             | 4,478     | 158,657     |
| <b>Total</b>                               | 1,926,373  | 608,609    | 7,730       | 73,585    | 2,616,296   |
|                                            | <b>74%</b> | <b>23%</b> | <b>0.3%</b> | <b>3%</b> | <b>100%</b> |

**Table S7.** Direct Costs of Overhead Departments at Meru DH (in USD)

| COST CENTRES                                     | Direct Costs |                 |                   |               |             |
|--------------------------------------------------|--------------|-----------------|-------------------|---------------|-------------|
|                                                  | Recurrent    |                 | Capital           |               | Total       |
|                                                  | Personnel    | Other recurrent | Medical equipment | Other capital |             |
| <b>General Administration</b>                    | 109,553      | 23,598          |                   | 1,614         | 134,764     |
| <b>Stores</b>                                    | 7,663        | 334             |                   | 340           | 8,336       |
| <b>Registry (Staff Records) and M&amp;E Unit</b> | 15,131       | 121             |                   | 314           | 15,565      |
| <b>General Transport/DIVO Unit</b>               | 12,041       | 12,574          |                   | 25,746        | 50,361      |
| <b>Kitchen + Housing</b>                         | 0            | 0               |                   | 4,929         | 4,929       |
| <b>Laundry Services</b>                          | 5,731        | 2,159           |                   | 1,902         | 9,792       |
| <b>Social Welfare Office</b>                     | 5,747        | 640             |                   | 350           | 6,736       |
| <b>BIMA Records</b>                              | 5,148        | 438             |                   | 677           | 6,262       |
| <b>Medical Record Service</b>                    | 9,357        | 2,571           |                   | 836           | 12,765      |
| <b>Dispensary/Pharmacy</b>                       | 34,321       | 624             |                   | 1,664         | 36,609      |
| <b>Utilities</b>                                 | 0            | 7,875           |                   | 0             | 7,875       |
| <b>Total</b>                                     | 204,691      | 50,932          |                   | 38,371        | 293,994     |
|                                                  | <b>73%</b>   | <b>18%</b>      | <b>0%</b>         | <b>9%</b>     | <b>100%</b> |

**Table S8.** Direct Costs of Clinical Departments at Meru DH (in USD)

| COST CENTRES | Direct Costs |         |       |
|--------------|--------------|---------|-------|
|              | Recurrent    | Capital | Total |
|              |              |         |       |

|                                                  | Personnel  | Other recurrent | Medical equipment | Other capital |             |
|--------------------------------------------------|------------|-----------------|-------------------|---------------|-------------|
| <b>OPD (GOPD, POPD, BIMA and DM OPD)</b>         | 170,574    | 178,775         |                   | 5,544         | 354,893     |
| <b>Laboratory</b>                                | 71,000     | 6,860           | 8,750             | 905           | 87,515      |
| <b>Radiology</b>                                 | 21,518     | 2,615           | 3,792             | 1,428         | 29,354      |
| <b>Main Operating Theatre</b>                    | 53,676     | 15,004          | 8,160             | 2,583         | 79,423      |
| <b>Minor Operating Theatre</b>                   | 54,919     | 14,067          | 641               | 1,184         | 70,811      |
| <b>Paediatric Ward</b>                           | 77,562     | 2,002           |                   | 1,298         | 80,861      |
| <b>Maternity Ward</b>                            | 138,830    | 18,699          |                   | 6,117         | 163,646     |
| <b>Female Ward</b>                               | 57,217     | 3,085           |                   | 3,782         | 64,083      |
| <b>Male Ward</b>                                 | 54,757     | 2,150           |                   | 4,026         | 60,933      |
| <b>RCH (Including CECAP Unit)</b>                | 64,259     | 1,049           |                   | 6,530         | 71,838      |
| <b>Physiotherapy + Nutrition + Health Office</b> | 35,776     | 612             |                   | 1,377         | 37,766      |
| <b>CTC +TB/Leprosy Unit</b>                      | 76,511     | 3,737           |                   | 4,605         | 84,853      |
| <b>Eye + Dental Units</b>                        | 55,879     | 991             |                   | 4,318         | 61,189      |
| <b>Total</b>                                     | 932,479    | 249,646         | 21,343            | 43,697        | 1,247,165   |
|                                                  | <b>75%</b> | <b>20%</b>      | <b>2%</b>         | <b>4%</b>     | <b>100%</b> |

**Table S9.** Direct Costs of Overhead Departments at Oltrumet DH (in USD)

| COST CENTRES                  | Direct Costs |                 |                   |               |        |
|-------------------------------|--------------|-----------------|-------------------|---------------|--------|
|                               | Recurrent    |                 | Capital           |               | Total  |
|                               | Personnel    | Other recurrent | Medical equipment | Other capital |        |
| <b>General Administration</b> | 50,924       | 3,946           |                   | 1,644         | 56,514 |
| <b>Accounts</b>               | 3,877        | 33              |                   | 345           | 4,255  |
| <b>Staff Housing</b>          | 0.14         | 0               |                   | 2,206         | 2,206  |
| <b>General Transport</b>      | 1,174        | 7,756           |                   | 28,123        | 37,053 |

|                               |            |            |           |            |            |
|-------------------------------|------------|------------|-----------|------------|------------|
| <b>Kitchen</b>                | 0          | 0          |           | 294        | 294        |
| <b>Laundry Service</b>        | 1,073      | 0          |           | 147        | 1,220      |
| <b>Security</b>               | 3,218      | 0          |           | 0          | 3,218      |
| <b>Mortuary</b>               | 3,910      | 0          |           | 294        | 4,204      |
| <b>Medical Record Service</b> | 9,482      | 4,205      |           | 309        | 13,996     |
| <b>Dispensary/Pharmacy</b>    | 11,987     | 0          |           | 817        | 12,804     |
| <b>Utilities</b>              | 0          | 3,464      |           | 0          | 3,464      |
| <b>Total</b>                  | 85,646     | 19,404     |           | 34,180     | 139,230    |
|                               | <b>68%</b> | <b>15%</b> | <b>0%</b> | <b>17%</b> | <b>100</b> |

**Table S10.** Direct Costs of Clinical Departments at Oltrumet DH (in USD)

| <b>COST CENTRES</b>                              | <b>Direct Costs</b> |                 |                   |               |         |
|--------------------------------------------------|---------------------|-----------------|-------------------|---------------|---------|
|                                                  | Recurrent           |                 | Capital           |               | Total   |
|                                                  | Personnel           | Other recurrent | Medical equipment | Other capital |         |
| <b>OPD (GOPD, POPD, BIMA and DM OPD)</b>         | 83,311              | 83,442          |                   | 897           | 167,650 |
| <b>Laboratory</b>                                | 18,535              | 142             | 1,858             | 613           | 21,147  |
| <b>Radiology</b>                                 | 3,763               | 80              | 388               | 242           | 4,473   |
| <b>Main Operating Theatre</b>                    | 21,710              | 235             | 1,250             | 806           | 24,001  |
| <b>Minor Operating Theatre</b>                   | 27,752              | 6,029           | 3,671             | 3,841         | 41,293  |
| <b>Paediatric Ward</b>                           | 8,653               | 1,507           |                   | 57            | 10,217  |
| <b>Maternity Ward</b>                            | 61,196              | 8,839           |                   | 4,333         | 74,368  |
| <b>Female Ward</b>                               | 21,645              | 13,652          |                   | 4,025         | 39,322  |
| <b>Male Ward</b>                                 | 15,321              | 2,884           |                   | 2,241         | 20,447  |
| <b>RCH (Including CECAP Unit)</b>                | 6,635               | 0               |                   | 477           | 7,112   |
| <b>Physiotherapy + Nutrition + Health Office</b> | 16,039              | 28              |                   | 872           | 16,939  |
| <b>CTC +TB/Leprosy Unit</b>                      | 5,192               | 0               |                   | 238           | 5,430   |

|                           |            |            |           |           |             |
|---------------------------|------------|------------|-----------|-----------|-------------|
| <b>Eye + Dental Units</b> | 8,694      | 87         |           | 1,892     | 10,673      |
| <b>Total</b>              | 298,446    | 116,926    | 7,167     | 20,533    | 443,072     |
|                           | <b>75%</b> | <b>20%</b> | <b>2%</b> | <b>4%</b> | <b>100%</b> |

**Table S11.** Final Costs of the Clinical Departments of Mt Meru RH after Step-Down of Overhead Costs (in USD)

| COST CENTRES                               | Final Costs |                 |                   |               |             |
|--------------------------------------------|-------------|-----------------|-------------------|---------------|-------------|
|                                            | Recurrent   |                 | Capital           |               | Total       |
|                                            | Personnel   | Other recurrent | Medical equipment | Other capital |             |
| <b>OPD/Casualty</b>                        | 257,406     | 246,224         |                   | 11,518        | 515,147     |
| <b>Laboratory</b>                          | 136,569     | 170,806         | 691               | 6,393         | 314,460     |
| <b>Radiology</b>                           | 75,047      | 38,292          | 6,047             | 2,682         | 122,069     |
| <b>OG Theatre</b>                          | 141,716     | 52,766          | 332               | 9,003         | 203,817     |
| <b>Main Operating Theatre</b>              | 179,777     | 46,542          | 659               | 11,525        | 238,503     |
| <b>Paediatric Ward</b>                     | 267,202     | 31,552          |                   | 25,834        | 324,589     |
| <b>Maternity Wards + Gynae OPD</b>         | 310,679     | 104,233         |                   | 52,722        | 467,634     |
| <b>SOPD</b>                                | 28,650      | 3,421           |                   | 1,124         | 33,195      |
| <b>Eye Department</b>                      | 54,820      | 7,714           |                   | 2,441         | 64,975      |
| <b>Medical Ward + CTC + TB Unit</b>        | 357,289     | 53,427          |                   | 36,923        | 447,639     |
| <b>Surgical Ward</b>                       | 321,067     | 90,511          |                   | 28,972        | 440,550     |
| <b>Dental Health</b>                       | 57,939      | 10,082          |                   | 1,742         | 69,763      |
| <b>Physiotherapy + Mental Health + ICU</b> | 178,375     | 20,371          |                   | 12,315        | 211,060     |
| <b>Total</b>                               | 2,366,536   | 875,941         | 7,730             | 203,194       | 3,453,401   |
|                                            | <b>69%</b>  | <b>25%</b>      | <b>0.2%</b>       | <b>6%</b>     | <b>100%</b> |

**Table S12.** Final Costs of the Clinical Departments at Meru DH after Step-Down of Overhead Costs (in USD)

| COST CENTRES | Final Costs |
|--------------|-------------|
|--------------|-------------|



|                                | Recurrent  |                 | Capital           |               | Total       |
|--------------------------------|------------|-----------------|-------------------|---------------|-------------|
|                                | Personnel  | Other recurrent | Medical equipment | Other capital |             |
| <b>OPD</b>                     | 200,712    | 416,706,946     |                   | 9,433         | 396,415     |
| <b>Laboratory</b>              | 82,811     | 9,890.09        | 8,750             | 2,335         | 103,786     |
| <b>Radiology</b>               | 25,019     | 3,575.62        | 3,792             | 1,943         | 34,330      |
| <b>Main Operating Theatre</b>  | 79,584     | 20,585.48       | 8,160             | 4,793         | 113,123     |
| <b>Minor Operating Theatre</b> | 67,922     | 17,413.61       | 641               | 3,157         | 89,133      |
| <b>Paediatric Ward</b>         | 93,825     | 6,482.15        |                   | 4,073         | 104,381     |
| <b>Maternity Ward</b>          | 166,942    | 26,587.98       |                   | 10,994        | 204,525     |
| <b>Female Ward</b>             | 72,899     | 7,380.52        |                   | 6,410         | 86,689      |
| <b>Male Ward</b>               | 69,920     | 6,499.33        |                   | 6,721         | 83,140      |
| <b>RCH (Including CECAP)</b>   | 79,970     | 5,856.12        |                   | 9,594         | 95,421      |
| <b>Physiotherapy</b>           | 42,679     | 3,150.22        |                   | 2,831         | 48,661      |
| <b>CTC + TB/Leprosy Unit</b>   | 89,984     | 9,117.17        |                   | 8,357         | 107,458     |
| <b>Eye + Dental Units</b>      | 64,902     | 4,263.15        |                   | 6,532         | 75,697      |
| <b>Total:</b>                  | 1,137,170  | 307,071.64      | 47,746,473        | 77,174        | 1,542,758   |
|                                | <b>74%</b> | <b>20%</b>      | <b>1%</b>         | <b>5%</b>     | <b>100%</b> |

**Table S13.** Final Costs of the Clinical Departments at Oltrumet DH after Step-Down of Overhead Costs (in USD)

| COST CENTRES                  | Final Costs |                 |                   |               |         |
|-------------------------------|-------------|-----------------|-------------------|---------------|---------|
|                               | Recurrent   |                 | Capital           |               | Total   |
|                               | Personnel   | Other recurrent | Medical equipment | Other capital |         |
| <b>Out-Patient Department</b> | 100,746     | 87,756          |                   | 4,832         | 193,334 |
| <b>Laboratory Department</b>  | 22,190      | 1,212           | 1,858             | 1,536         | 26,796  |
| <b>Radiology</b>              | 11,093,932  | 431             | 388               | 523           | 6,301   |
| <b>RCH</b>                    | 27,205      | 1,887           | 1,250             | 2,248         | 32,590  |

|                                       |            |            |           |           |             |
|---------------------------------------|------------|------------|-----------|-----------|-------------|
| <b>Main Operating Theatre</b>         | 36,024     | 8,742      | 3,671     | 5,655     | 54,092      |
| <b>Minor Operating Theatre</b>        | 11,595     | 2,350      |           | 753       | 14,698      |
| <b>Maternity Ward</b>                 | 79,590     | 14,199     |           | 8,926     | 102,715     |
| <b>Female Ward (+Paediatric) ward</b> | 32,168     | 16,665     |           | 6,462     | 55,295      |
| <b>Male Ward</b>                      | 23,892     | 5,242      |           | 4,139     | 33,274      |
| <b>Physiotherapy</b>                  | 7,944      | 693        |           | 1,067     | 9,704       |
| <b>CTC + TB Unit</b>                  | 18,679     | 1,514      |           | 2,215     | 22,409      |
| <b>Mental Health</b>                  | 6,653      | 635        |           | 817       | 8,105       |
| <b>Dental Unit</b>                    | 12,446     | 1,055      |           | 2,744     | 16,245      |
| <b>Total</b>                          | 384,092    | 142,381    | 7,167     | 41,917    | 575,557     |
|                                       | <b>67%</b> | <b>25%</b> | <b>1%</b> | <b>7%</b> | <b>100%</b> |

**Table S14.** Activity Profile per Type of Surgery at Mt Meru RH

| <b>INDEX SURGERIES</b>      | <b>Pre-op consults</b> | <b>Pre-op stay (surgical)</b> | <b>Pre-op stay (Obs/Gynae)</b> | <b>Lab tests</b> | <b>Imaging tests</b> | <b>OT time (main OT)</b> | <b>OT time (Obs/Gynae)</b> | <b>Post-op stay (surgical)</b> | <b>Post-op stay (Obs/Gynae)</b> | <b>Follow-up</b> |
|-----------------------------|------------------------|-------------------------------|--------------------------------|------------------|----------------------|--------------------------|----------------------------|--------------------------------|---------------------------------|------------------|
| <b>Herniorrhaphy</b>        | 1                      | 1                             | 0                              | 1                | 0                    | 0.88                     | 0                          | 1                              | 0                               | 2                |
| <b>Laparotomy</b>           | 0                      | 0                             | 0                              | 1                | 1                    | 2.25                     | 0                          | 4                              | 0                               | 2.5              |
| <b>Appendectomy</b>         | 0                      | 0.1                           | 0                              | 1                | 0                    | 0.75                     | 0                          | 1                              | 0                               | 2                |
| <b>Adenotonsillectomy</b>   | 2                      | 1                             | 0                              | 1                | 0                    | 0.63                     | 0                          | 0.2                            | 0                               | 1                |
| <b>Tonsillectomy</b>        | 2                      | 1                             | 0                              | 1                | 0                    | 0.33                     | 0                          | 0.2                            | 0                               | 1                |
| <b>Adenectomy</b>           | 2                      | 1                             | 0                              | 1                | 0                    | 0.33                     | 0                          | 0.2                            | 0                               | 1                |
| <b>Surgical debridement</b> | 0                      | 0.33                          | 0                              | 1                | 1                    | 2.00                     | 0                          | 24.5                           | 0                               | 4                |
| <b>ORIF</b>                 | 4                      | 1                             | 0                              | 1                | 1                    | 1.50                     | 0                          | 2                              | 0                               | 4                |
| <b>CS</b>                   | 0.5                    | 0                             | 0.5                            | 1                | 1                    | 0                        | 0.75                       | 0                              | 1.5                             | 2                |
| <b>Hysterectomy</b>         | 4                      | 0                             | 2                              | 1                | 1                    | 0                        | 1.25                       | 0                              | 2.5                             | 2                |

|                      |   |   |   |   |   |   |      |   |     |   |
|----------------------|---|---|---|---|---|---|------|---|-----|---|
| <b>Myomectomy</b>    | 2 | 0 | 2 | 1 | 1 | 0 | 2.50 | 0 | 2.5 | 2 |
| <b>Salpingectomy</b> | 0 | 0 | 0 | 1 | 1 | 0 | 0.54 | 0 | 2.5 | 2 |

**Table S15.** Activity Profile per Type of Surgery at Meru DH

| <b>INDEX SURGERIES</b>       | <b>Pre-op consults</b> | <b>Pre-op stay (surgical)</b> | <b>Pre-op stay (Obs/Gynae)</b> | <b>Lab tests</b> | <b>Imaging tests</b> | <b>OT time (main OT)</b> | <b>OT time (Obs/Gynae)</b> | <b>Post-op stay (surgical)</b> | <b>Post-op stay (Obs/Gynae)</b> | <b>Follow-up</b> |
|------------------------------|------------------------|-------------------------------|--------------------------------|------------------|----------------------|--------------------------|----------------------------|--------------------------------|---------------------------------|------------------|
| <b>CS</b>                    | 0.5                    | 0                             | 0.25                           | 1                | 1                    | 0.68                     | 0                          | 0                              | 2.17                            | 2.33             |
| <b>Salpingectomy</b>         | 0                      | 0                             | 0                              | 1                | 1                    | 0.78                     | 0                          | 2.4                            | 0                               | 1.8              |
| <b>Appendectomy</b>          | 0.1                    | 0.1                           | 0                              | 1                | 1                    | 0.75                     | 0                          | 1                              | 0                               | 2                |
| <b>Herniorrhaphy</b>         | 1                      | 1                             | 0                              | 1                | 0                    | 1.19                     | 0                          | 2.75                           | 0                               | 2                |
| <b>Myomectomy</b>            | 3.5                    | 1                             | 0                              | 1                | 1                    | 1.29                     | 0                          | 2.83                           | 0                               | 1.67             |
| <b>Hydrocoelectomy</b>       | 1                      | 1                             | 0                              | 1                | 0                    | 0.33                     | 0                          | 2                              | 0                               | 2                |
| <b>Other major surgeries</b> | 0                      | 0.33                          | 0                              | 1                | 1                    | 2                        | 0                          | 2.5                            | 0                               | 4                |

**Table S16.** Activity Profile per Type of Surgery at Oltrumet DH

| <b>INDEX SURGERIES</b> | <b>Pre-op consults</b> | <b>Pre-op stay (surgical)</b> | <b>Pre-op stay (Obs/Gynae)</b> | <b>Lab tests</b> | <b>Imaging tests</b> | <b>OT time (main OT)</b> | <b>OT time (Obs/Gynae)</b> | <b>Post-op stay (surgical)</b> | <b>Post-op stay (Obs/Gynae)</b> | <b>Follow-up</b> |
|------------------------|------------------------|-------------------------------|--------------------------------|------------------|----------------------|--------------------------|----------------------------|--------------------------------|---------------------------------|------------------|
| <b>CS</b>              | 0.5                    | 0                             | 0.25                           | 1                | 1                    | 0.63                     | 0                          | 0                              | 2.5                             | 2                |
| <b>Herniorrhaphy</b>   | 2                      | 1                             | 0                              | 1                | 0                    | 0.50                     | 0                          | 2                              | 2                               | 2                |
| <b>Myomectomy</b>      | 4                      | 1                             | 0                              | 1                | 1                    | 1.88                     | 0                          | 1                              | 2.5                             | 2                |

|                 |   |   |   |   |   |      |   |     |   |   |
|-----------------|---|---|---|---|---|------|---|-----|---|---|
| Other surgeries | 2 | 1 | 0 | 1 | 0 | 0.63 | 0 | 0.2 | 0 | 0 |
|-----------------|---|---|---|---|---|------|---|-----|---|---|

**Abbreviations Used in Tables S1-S16:** BIMA = National Health Insurance Fund; CECAP = Cervical Cancer Prevention; CS = Caesarean Section; CTC = Care and Treatment Centre; DH = District Hospital; DIVO = District Immunisation and Vaccination Office; DM = Diabetes Mellitus; ENT = Ear, Nose and Throat; GOPD = General Out-Patient Department; ICU = Intensive Care Unit; Intra-op = Intra-operative; Lab = Laboratory; M&E = Monitoring and Evaluation; MA = Medical Attendants; Mt = Mount; Obs/Gynae = Obstetrics and Gynaecology; OPD = Out-Patient Department; OT = Operating Theatre; POPD = Paediatric Out-Patient Department; Post-op = Post-operative; Pre-op = Pre-operative; RCH = Reproductive and Child Health; RH = Referral Hospital; SOPD = Surgical Out-Patient Department; TB = Tuberculosis; USD = United States Dollars.
